# Supplementary material for: Efficacy of Acupuncture and Its Influence on the Emotional Network in Insomnia Disorder: Protocol for a Randomized Controlled Clinical Trial
Source: Research Square preprint supplement (doi:10.21203/rs.3.rs-640684/v1), 2021-06-28
Supplement: Supplementary file 1 [file bd85a616ab248d3521a81551.docx]

Table 1. Enrolment, intervention, and measurement schedule

| Table 1. Enrolment, intervention, and measurement schedule | | | | | | | | | | | |
| --- | --- | --- | --- | --- | --- | --- | --- | --- | --- | --- | --- |
|  | | | **Treatment phase (week)** | | | | | **Follow-up phase (week)** | | | |
| **Timepoint** | **-w1** | **Baseline** | **w1** | **w2** | **w3** | **w4** | | **w5** |  | | **W12** |
| **Enrolment** | | | | | | | | | | | |
| Inclusion/exclusion | * |  |  |  |  |  | |  |  |  |  |
| Informed consent | * |  |  |  |  |  | |  |  |  |  |
| allocation |  | * |  |  |  |  | |  |  |  |  |
| **Intervention** | | | | | | | | | | | |
| Spirit-regulating group |  |  |  | | | |  | | | | |
| Non-effective acupoints acupuncture group |  |  |  | | | |  | | | | |
| **Measurements** | | | | | | | | | | | |
| PSQI |  | * |  |  |  | * | |  |  |  | * |
| HAMA |  | * |  |  |  | * | |  |  |  | * |
| HAMD |  | * |  |  |  | * | |  |  |  | * |
| HAS |  | * |  |  |  | * | |  |  |  | * |
| FS-14 |  | * |  |  |  | * | |  |  |  | * |
| r-fMRI |  | * |  |  |  | * | |  |  |  | * |
| Actigraphy |  | * |  |  |  | * | |  |  |  | * |
| Sleep diary |  | | | | | | | | | | |
